# Supplementary material for: Crateva unilocularis Buch. shoots attenuate d-galactose-induced brain injury and cognitive disorders of mice through the PI3K/Akt/Nrf2 pathway
Source: Royal Society of Chemistry journal article supplement (doi:10.1039/d1fo03452a), 2022-01-01

## SUPPORTING INFORMATION

### ***Crateva unilocalaris* Buch. shoots attenuate D-galactose-induced brain injury and cognitive disorders of mice through PI3K/Akt/Nrf2 pathway**

Qian Ma<sup>1#</sup>, Yanmei Chen<sup>2#</sup>, Xue Zhang<sup>3</sup>, Shengbao Cai<sup>1</sup>, Yilin Sun<sup>1</sup>, Nan Ma<sup>1</sup>, Junjie Yi<sup>1\*</sup>

<sup>1</sup>Faculty of Agriculture and Food, Yunnan Institute of Food Safety, Kunming University of Science and Technology, Kunming, Yunnan Province, People's Republic of China, 650500.

<sup>2</sup>Department of Basic Medicine, Medical School, Kunming University of Science and Technology, Kunming, Yunnan Province, People's Republic of China, 650500.

<sup>3</sup>College of Food Engineering, Henan University of Animal Husbandry and Economy, Zhengzhou, Henan Province, People's Republic of China, 450011.

<sup>#</sup>These authors contributed equally to this work

**\* Corresponding author and proofs**

Junjie Yi

E-mail address: junjieyi@kust.edu.cn

Fig. S1 Negative ion current chromatogram of ethanol extract of *Crateva unilocalaris* shoots Peaks identification and their MS data are shown in Table S1.

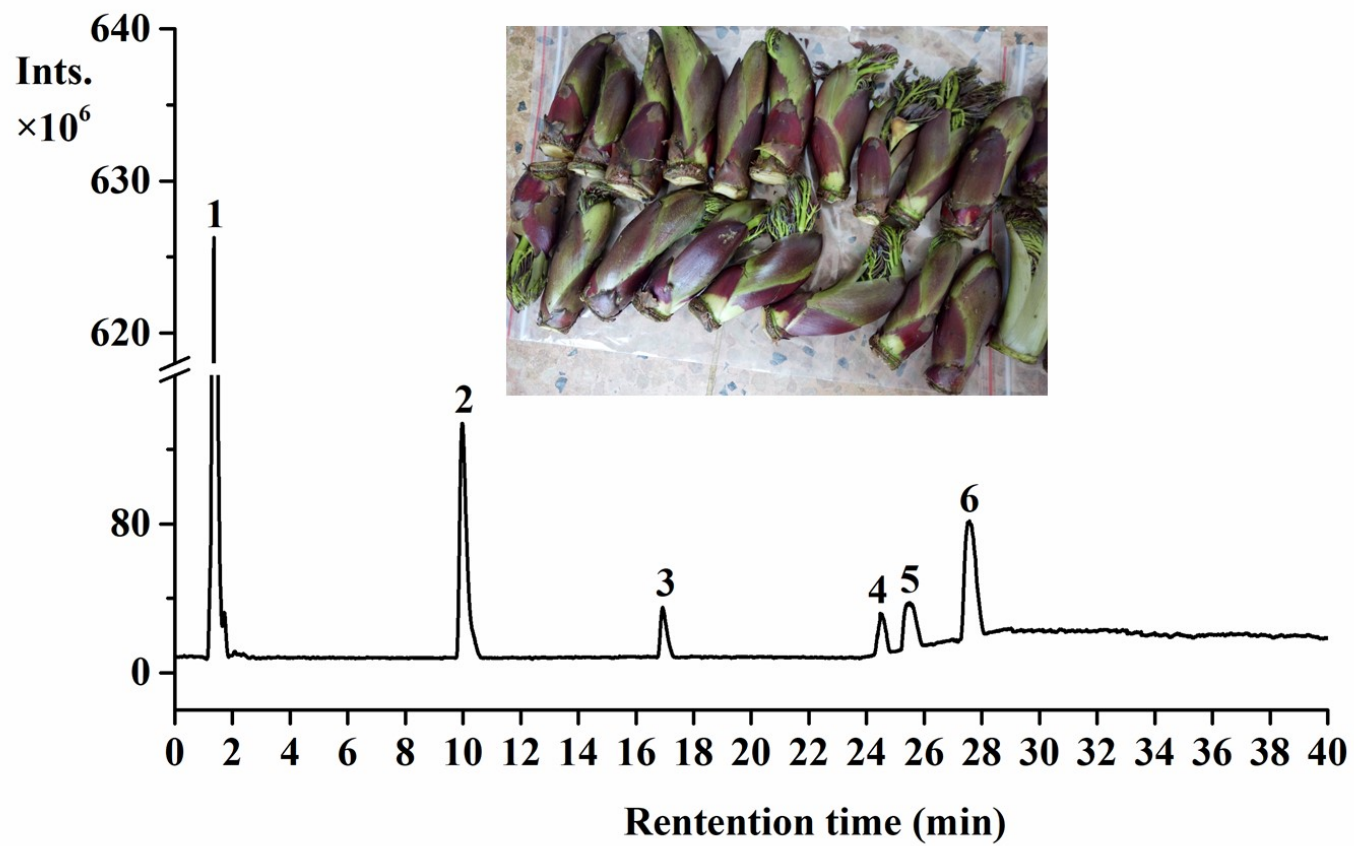

**Table S1** Phytochemical compounds identified in *Crateva unilocalaris* shoots by UHPLC-ESI-HRMS/MS in negative mode.

| Peak No. | Compounds                 | Molecular formula                               | Retention time (min) | [M-H] <sup>-</sup> (m/z) | Error (ppm) | MS/MS ion fragments          | Reference |
|----------|---------------------------|-------------------------------------------------|----------------------|--------------------------|-------------|------------------------------|-----------|
| 1        | Quinic acid               | C <sub>7</sub> H <sub>12</sub> O <sub>6</sub>   | 1.36                 | 191.0552                 | 0.918       | 67.0176, 85.0280, 93.0330    | Standard  |
| 2        | Chlorogenic acid          | C <sub>16</sub> H <sub>18</sub> O <sub>9</sub>  | 9.96                 | 353.0876                 | 2.496       | 85.0281, 93.0332, 191.0552   | Standard  |
| 3        | 3,4-Dicaffeoylquinic acid | C <sub>25</sub> H <sub>24</sub> O <sub>12</sub> | 16.92                | 515.1193                 | 1.665       | 135.0440, 179.0341, 191.0553 | Standard  |
| 4        | Achyranthoside D          | C <sub>53</sub> H <sub>82</sub> O <sub>25</sub> | 24.48                | 1117.5436                | 2.793       | 301.0544, 455.3529, 523.3817 | 1         |
| 5        | Ginsenoside Ro            | C <sub>48</sub> H <sub>76</sub> O <sub>19</sub> | 25.51                | 955.4911                 | 1.061       | 75.0073, 101.0230, 523.3792  | 2         |
| 6        | Chikusetsusaponin IVa     | C <sub>42</sub> H <sub>66</sub> O <sub>14</sub> | 27.57                | 793.4382                 | 1.698       | 569.3849, 570.3878, 631.3858 | Standard  |

All standards were purchased from Must bio-technology CO., LTD (Chengdu, Sichuan, China) with purity ≥ 97%.

**Reference:**

1. F. Allen, R. Greiner, & D. Wishart. Competitive fragmentation modeling of ESIMS/MS spectra for putative metabolite identification. *Metabolomics*, 2015, **11**, 98–110.
2. Y. J. Li, H. L. Wei, L. W. Qi, J. Chen, M. T. Ren, & P. Li. Characterization and identification of saponins in *Achyranthes bidentata* by rapid-resolution liquid chromatography with electrospray ionization quadrupole time-of-flight tandem mass spectrometry. *Rapid Commun. in Mass Sp.*, 2010, **24**, 2975–2985

**Fig. S2** Effects of *Crateva unilocalaris* shoots administration on the body weights and food intake of mice; C, the control group; M, the model group; EL, the low dose of ethanol extract (200 mg/kg); EH, the high dose of ethanol extract (600 mg/kg).

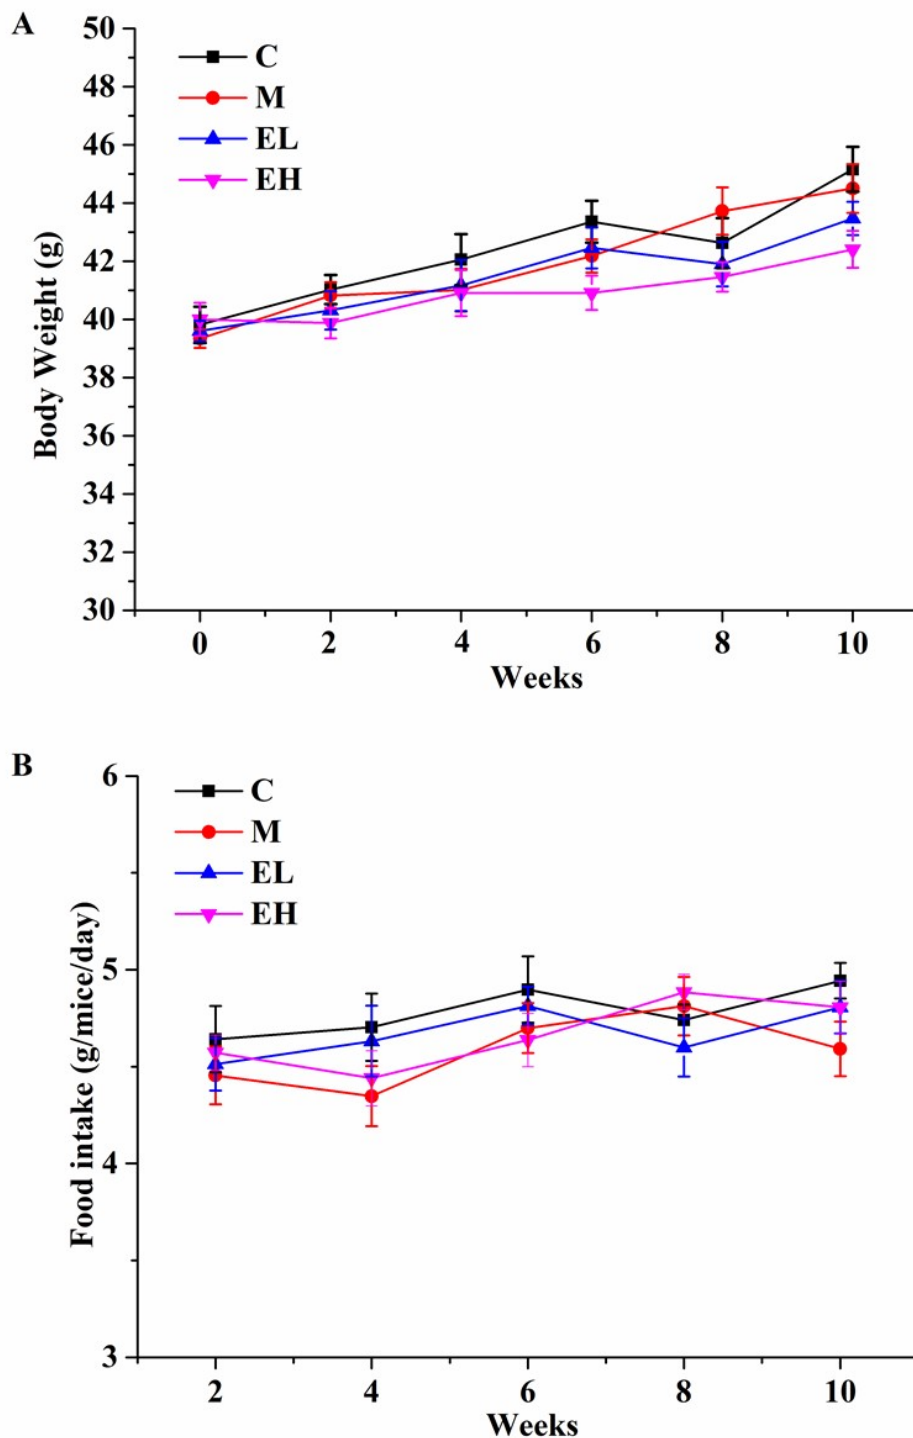

Raw images of western blot in Figure 4

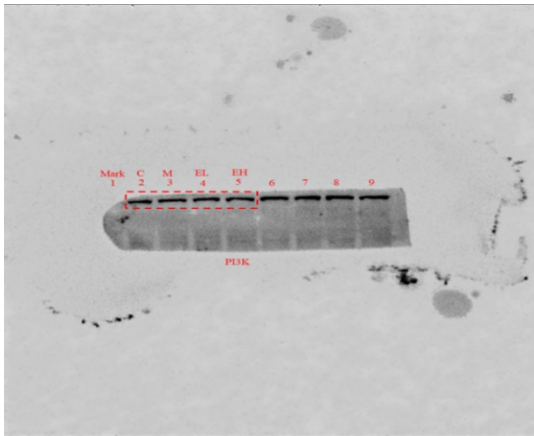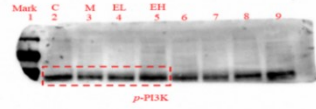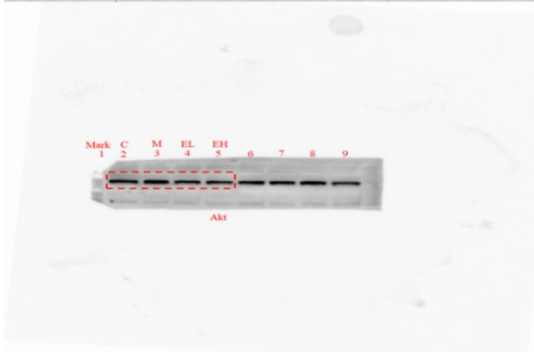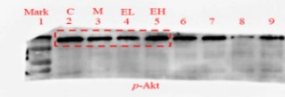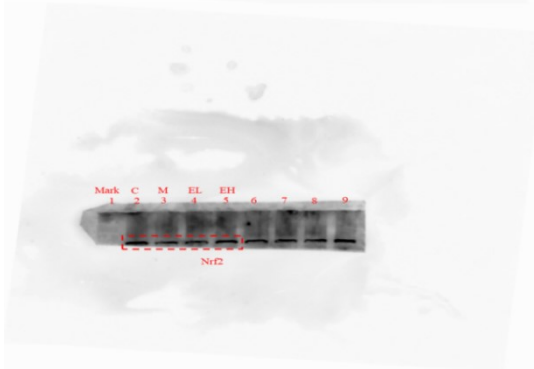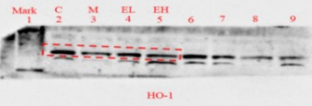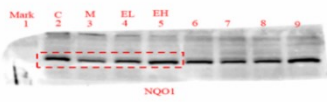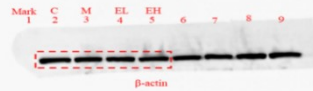

# Raw images of western blot in Figure 5A

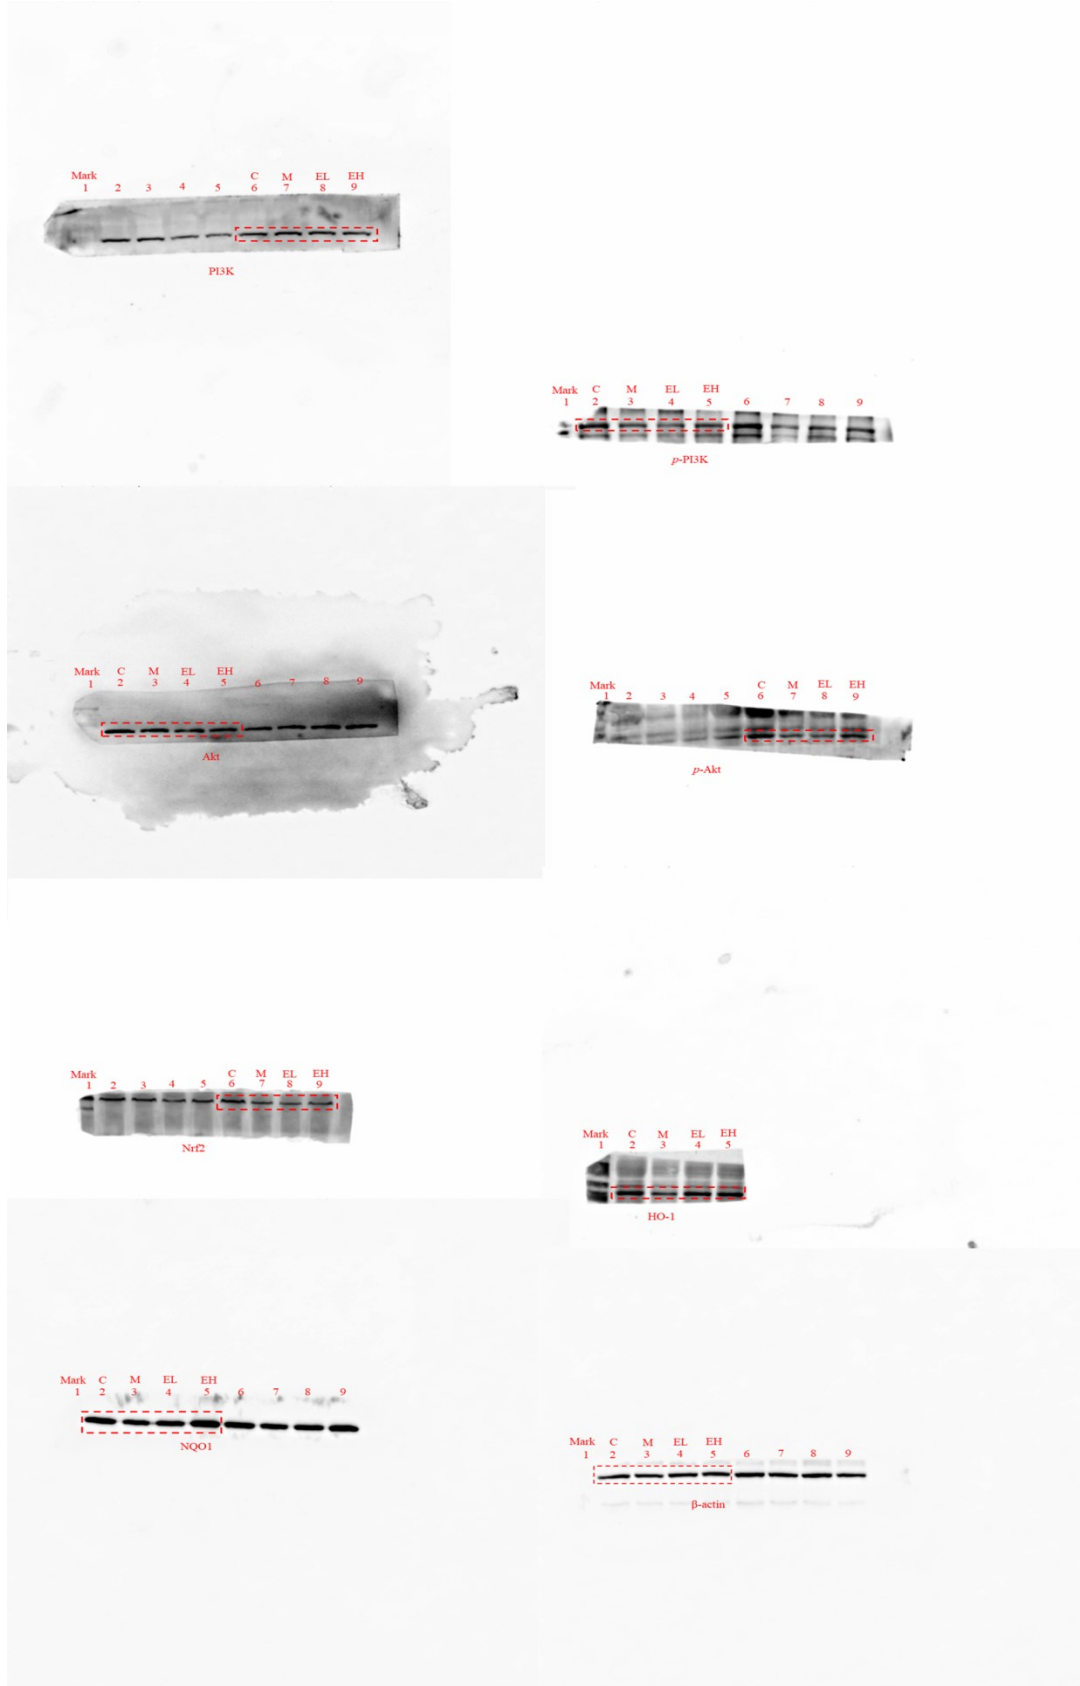

Raw images of western blot in Figure 5E

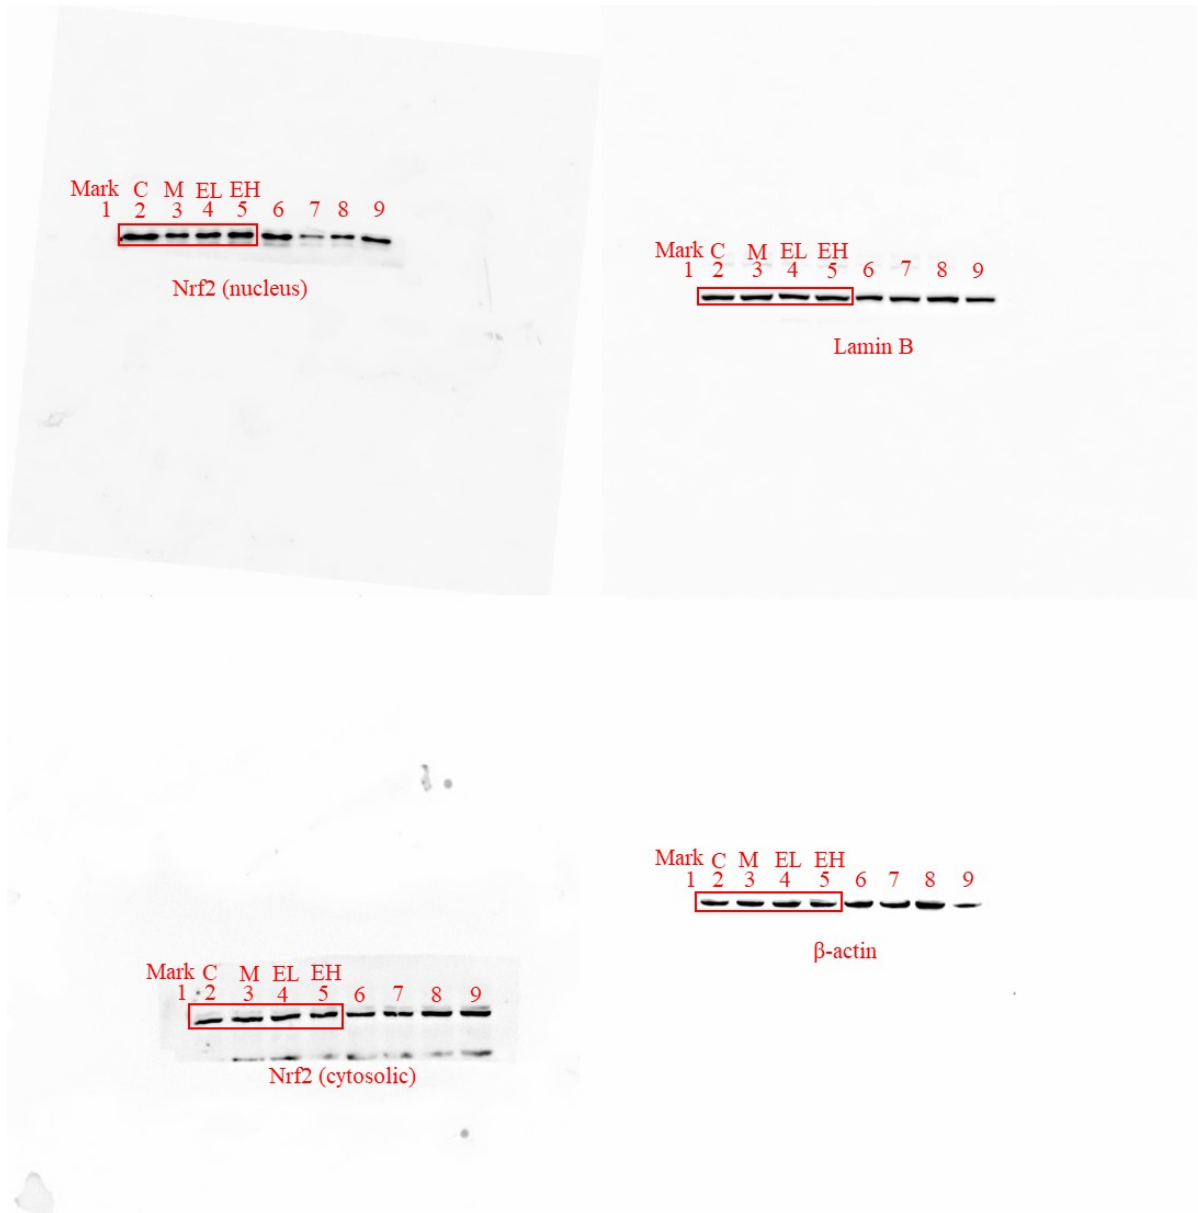

Supplement: d1fo03452a1.pdf [file d1fo03452a1.pdf]
